# Supplementary material
Source: PubMed Central journal article supplement (PMC1691615)
Supplement: 15129965s01.pdf [file 15129965s01.pdf]

This is an electronic appendix to the paper by Lavrov *et al.* 2004 Phylogenetic position of the Pentastomida and [pan]crustacean relationships. *Proc. R. Soc. Lond. B* **271**, 537–544. (DOI 10.1098/rspb.2003.2631.)

Electronic appendices are refereed with the text. However, no attempt is made to impose a uniform editorial style on the electronic appendices.

Electronic Appendix A. Specific primers used for mtDNA amplification

| Primer                  | Sequence                        |
|-------------------------|---------------------------------|
| Armillifer-cox1-F1      | 5'-CAACCATCCTTAACATACACTCC-3'   |
| Armillifer-cox1-R1      | 5'-TCATAGGGATGAGTCAGTTCCCG-3'   |
| Armillifer-cob-F1       | 5'-GATTCCTTCACAGCAATCACCAC-3'   |
| Armillifer-cob-R1       | 5'-GATGTTGTGTCCACCTCATAGTC-3'   |
| Pollicipes-cox1-F1      | 5'-TGATCAGCGATAGTTGGAACAGC-3'   |
| Pollicipes-cox1-R1      | 5'-CTTCCAGGTTGACCTAGTTCTGC-3'   |
| Pollicipes-cob-F1       | 5'-TGCAGTAGATAATGCTACCTTGAC-3'  |
| Pollicipes-cob-R1       | 5'-AGCAGGTGGATAACAGCTATTGC-3'   |
| Speleonectes-cox2-F1    | 5'-ATCAGACGAGCCCATATCACCAC-3'   |
| Speleonectes-cox2-R1    | 5'-AAGCCTTCTGCACTAGTCTGCCA-3'   |
| Speleonectes-cob-F1     | 5'-CCATTCCATCCATACTTCCTAAC-3'   |
| Speleonectes-cob-R1     | 5'-GTCTTTCCAATGTAAGGTAAGTGC-3'  |
| Argulus-cox1-F1         | 5'-CAGTAGAGTCTGGAGCTGGAAC-5'    |
| Argulus-cox2-R1         | 5'-AGTATGTCTAATAGGAGGAGCTC-3'   |
| Argulus-rns-F1          | 5'-AACGATAATCCACGAGTATTCTAC-3'  |
| Argulus-rns-R1          | 5'-ACTTTTACTTCTAAATCCTCCTTCA-3' |
| Argulus-nad5-F1         | 5'-TTCAGCCTGACTTCCTGCTGC-3'     |
| Argulus-nad5-R1         | 5'-TTCATAACATCCAGATAACCAGA-3'   |
| Hutchinsoniella-cox1-F1 | 5'-CTTTGCCTATTTTGGCTGGGGCTA-3'  |
| Hutchinsoniella-cox1-R1 | 5'-CCGCCTGACCTAACTCAGATCGA-3'   |
| Hutchinsoniella-nad5-F1 | 5'-TTCTCCGCTTGATTACCCATGGC-3'   |
| Hutchinsoniella-nad5-R1 | 5'-CTCAGATAAACACCCGCTGTGAC-3'   |
| Hutchinsoniella-rns-F1  | 5'-TTGGTTAAACATGTGCCAGCTAC-3'   |
| Hutchinsoniella-rns-R1  | 5'-TTAGCTATAACCATGGCTTGACATC-3' |
